# Supplementary material for: The Prevalence of Stressful Life Events among a Racially Diverse National Sample of Adolescents
Source: Research Square preprint supplement (doi:10.21203/rs.3.rs-8414362/v1), 2026-01-21
Supplement: Supplementary file 1 [file 8ad9f9fa0782d87211f18891.xlsx]

## Sheet: Stable 1
Supplemental Table 1. Individual Items from the Stressful Life Events Measures.
Measure	Individual Items
Experiences of Discrimination	In the past 12 months, have you felt discriminated against: because of your race, ethnicity, or color? Definition of ethnicity: groups of people who have the same customs, or origin
	In the past 12 months, have you felt discriminated against: because you are (or your family is) from another country?
	In the past 12 months, have you felt discriminated against: because of your weight?
Financial Adversity	In the past 12 months, has there been a time when you and your immediate family experienced any of the following: Needed food but couldn't afford to buy it or couldn't afford to go out to get it?
	In the past 12 months, has there been a time when you and your immediate family experienced any of the following: Were without telephone service because you could not afford it?
	In the past 12 months, has there been a time when you and your immediate family experienced any of the following: Didn't pay the full amount of the rent or mortgage because you could not afford it?
	In the past 12 months, has there been a time when you and your immediate family experienced any of the following: Were evicted from your home for not paying the rent or mortgage?
	In the past 12 months, has there been a time when you and your immediate family experienced any of the following: Had services turned off by the gas or electric company, or the oil company wouldn't deliver oil because payments were not made?
	In the past 12 months, has there been a time when you and your immediate family experienced any of the following: Had someone who needed to see a doctor or go to the hospital but didn't go because you could not afford it?
	In the past 12 months, has there been a time when you and your immediate family experienced any of the following: Had someone who needed a dentist but couldn't go because you could not afford it?
Adverse Life Eventsa	Someone in family died?
	Family member was seriously injured?
	Saw crime or accident?
	Lost a close friend?
	Close friend was seriously sick/injured?
	Negative change in parent's financial situation?
	Family member had drug and/or alcohol problem?
	You got seriously sick?
	You got seriously injured?
	Parents argued more than previously?
	Mother/father figure lost job?
	One parent was away from home more often?
	Someone in the family was arrested?
	Close friend died?
	Family member had mental/emotional problem?
	Brother or sister left home?
	Was a victim of crime/violence/assault?
	Parents separated or divorced?
	Parents/caregiver got into trouble with the law?
	Attended a new school?
	Family moved?
	One of the parents/caregivers went to jail?
	Got new stepmother or stepfather?
	Parent/caregiver got a new job?
	Got new brother or sister?
aSame questions were asked for youth, as well as for caregivers about youth.

## Sheet: Stable 2
Supplemental Table 2. Stressful Life Event Adjusted Prevalence Rates in Whole Sample and by Race/Ethnicity Group
	Total Sample (n=10,973)		White (n=5,871)		Black (n=1,587)		Hispanic (n=2,198)		Asian (n=209)		Multiracial/
											Multiethnic (n=1,106)
Variable Label	%	SE	%	SE	%	SE	%	SE	%	SE	%	SE
Endorsement 1 or more dichotomous Experiences of Discrimination items	0.0977	0.01	0.0645	0.01	0.1657	0.01	0.1293	0.01	0.1297	0.02	0.113	0.01
Endorsement of Any Financial Adversity Item	0.2212	0.02	0.1516	0.01	0.3664	0.02	0.2902	0.01	0.1016	0.02	0.3312	0.04
Youth Endorsement of Any ALE Item	0.4996	0.01	0.5021	0.01	0.5416	0.01	0.4897	0.02	0.275	0.03	0.5462	0.03
Caregiver Endorsement of Any ALE Item	0.8287	0.01	0.8249	0.01	0.8633	0.01	0.833	0.01	0.7498	0.04	0.8173	0.03
Endorsement of Any SLE	0.9008	0.01	0.8879	0.01	0.9494	0.01	0.9128	0.01	0.8502	0.03	0.8954	0.03
Endorsement of 4+ SLE	0.4592	0.02	0.4149	0.02	0.5899	0.02	0.5053	0.02	0.2541	0.04	0.5125	0.03
Abbreviations. %=Percentage; SE=standard error; ALE=Adverse Life Event; SLE=Stressful Life Event

## Sheet: Stable 3
Supplemental Table 3. Logliklihood Tests
Comparison	SLE	Log Liklihood	Df	Chisq	p-value
White v. Other Racial/Ethnic Groups	Endorsement 1 or more dichotomous Experiences of Discrimination items	-1870.5	1	136.21	<.001
	Endorsement of Any Financial Adversity Item	-3764.1	1	279.66	<.001
	Caregiver Endorsement of Any ALE Item	-7325.9	1	7.4364	0.006392
	Youth Endorsement of Any ALE Item	-4979.6	1	2.8016	0.09417
	Endorsement of Any SLE	-2624.7	1	25.675	<.001
Black v. Other Racial/Ethnic Groups	Endorsement 1 or more dichotomous Experiences of Discrimination items	-1890.2	1	96.701	<.001
	Endorsement of Any Financial Adversity Item	-3818.7	1	170.35	<.001
	Caregiver Endorsement of Any ALE Item	-7324.7	1	9.991	0.001573
	Youth Endorsement of Any ALE Item	-4974.1	1	13.72	<.001
	Endorsement of Any SLE	-2620	1	35.136	<.001
Hispanic v. Other Racial/Ethnic Groups	Endorsement 1 or more dichotomous Experiences of Discrimination items	-1932.8	1	11.692	0.0006278
	Endorsement of Any Financial Adversity Item	-3874.7	1	58.388	<.001
	Caregiver Endorsement of Any ALE Item	-7329	1	1.2798	0.2579
	Youth Endorsement of Any ALE Item	-4980.2	1	1.5511	0.213
	Endorsement of Any SLE	-2632.9	1	9.2676	0.002332
Asian v. Other Racial/Ethnic Groups	Endorsement 1 or more dichotomous Experiences of Discrimination items	-1938	1	1.1532	0.2829
	Endorsement of Any Financial Adversity Item	-3899.5	1	8.893	0.002863
	Caregiver Endorsement of Any ALE Item	-7310.7	1	37.808	<.001
	Youth Endorsement of Any ALE Item	-4975.8	1	10.445	0.00123
	Endorsement of Any SLE	-2632.5	1	10.169	0.001428
MM v. Other Racial/Ethnic Groups	Endorsement 1 or more dichotomous Experiences of Discrimination items	-1935.9	1	5.3729	0.02045
	Endorsement of Any Financial Adversity Item	-3898.6	1	10.597	0.001132
	Caregiver Endorsement of Any ALE Item	-7327.1	1	5.1057	0.02385
	Youth Endorsement of Any ALE Item	-4979.7	1	2.5179	0.1126
	Endorsement of Any SLE	-2637.1	1	0.9791	0.3224
Female vs. Male	Endorsement 1 or more dichotomous Experiences of Discrimination items	-1936.6	1	4.0711	0.04362
	Endorsement of Any Financial Adversity Item	-3903.4	1	0.9565	0.3281
	Caregiver Endorsement of Any ALE Item	-7329.2	1	0.9889	0.32
	Youth Endorsement of Any ALE Item	-4980.6	1	0.8176	0.3659
	Endorsement of Any SLE	-2637.4	1	0.2254	0.635
Abbreviations. ALE=Adverse Life Event; SLE=Stressful Life Event; Df=degrees of freedom; Chisq=chi-squared test statistic

## Sheet: Stable 4
Supplemental Table Models Estimates for Each Racial/Ethic Group versus Other Racial/Ethnic Groups with SLE Total Scores as Outcome
Group Comparison	SLE Variable	b	SE	t	p-value
Asian vs. Other Racial/Ethnic Groups	Endorsement 1 or more dichotomous Experiences of Discrimination items	0.1766	0.07208	2.451	0.0143
	Endorsement of Any Financial Adversity Item	-0.1549	0.07268	-2.131	0.0331
	Caregiver Endorsement of Any ALE Item	-0.312	0.07212	-4.326	<.001
	Youth Endorsement of Any ALE Item	-0.312	0.07212	-4.326	<.001
	Endorsement of Any SLE	-0.3656	0.0727	-5.029	<.001
Black vs. Other Racial/Ethnic Groups	Endorsement 1 or more dichotomous Experiences of Discrimination items	0.26076	0.02961	8.807	<.001
	Endorsement of Any Financial Adversity Item	0.36827	0.03091	11.915	<.001
	Caregiver Endorsement of Any ALE Item	0.28377	0.03011	9.425	<.001
	Youth Endorsement of Any ALE Item	0.28377	0.03011	9.425	<.001
	Endorsement of Any SLE	0.3229	0.0307	10.52	<.001
Hispanic vs. Other Racial/Ethnic Groups	Endorsement 1 or more dichotomous Experiences of Discrimination items	0.111	0.02759	4.023	<.001
	Endorsement of Any Financial Adversity Item	0.18566	0.02864	6.481	<.001
	Caregiver Endorsement of Any ALE Item	0.05916	0.0283	2.09	0.0366
	Youth Endorsement of Any ALE Item	0.05916	0.0283	2.09	0.0366
	Endorsement of Any SLE	0.13489	0.02878	4.687	<.001
MM vs. Other Racial/Ethnic Groups	Endorsement 1 or more dichotomous Experiences of Discrimination items	0.07421	0.03306	2.245	0.0248
	Endorsement of Any Financial Adversity Item	0.1102	0.03368	3.272	0.00107
	Caregiver Endorsement of Any ALE Item	0.0003834	0.03331	0.012	0.991
	Youth Endorsement of Any ALE Item	0.0003834	0.03331	0.012	0.991
	Endorsement of Any SLE	0.09694	0.03393	2.857	0.00428
White vs. Other Racial/Ethnic Groups	Endorsement 1 or more dichotomous Experiences of Discrimination items	-0.25543	0.02072	-12.33	<.001
	Endorsement of Any Financial Adversity Item	-0.33882	0.02205	-15.365	<.001
	Caregiver Endorsement of Any ALE Item	-0.15716	0.0218	-7.209	<.001
	Youth Endorsement of Any ALE Item	-0.15716	0.0218	-7.209	<.001
	Endorsement of Any SLE	-0.2619	0.02218	-11.807	<.001
Abbreviations. ALE=Adverse Life Event; SLE=Stressful Life Event; b=beta estimate; SE=standard error; t=t-test statistic

## Sheet: Stable 5
Supplemental Table 5. Stressful Life Event Adjusted Prevalence Rates in Whole Sample and by Race/Ethnicity Group Separately by Sex
	Total Sample (n=10,973)		White (n=5,871)		Black (n=1,587)		Hispanic (n=2,198)		Asian (n=209)		Multiracial/
											Multiethnic (n=1,106)
By Male Sex
Variable Label	%	SE	%	SE	%	SE	%	SE	%	SE	%	SE
Endorsement 1 or more dichotomous Experiences of Discrimination items	0.0892	0.01	0.0577	0.01	0.1539	0.02	0.122	0.01	0.1272	0.03	0.0962	0.02
Endorsement of Any Financial Adversity Item	0.2202	0.02	0.1566	0.01	0.3592	0.02	0.2799	0.02	0.1031	0.03	0.3555	0.05
Caregiver Endorsement of Any ALE Item	0.4991	0.01	0.4958	0.01	0.578	0.02	0.484	0.02	0.3147	0.04	0.5345	0.03
Youth Endorsement of Any ALE Item	0.8349	0.01	0.8347	0.01	0.8696	0.01	0.8322	0.01	0.767	0.05	0.8159	0.03
Endorsement of Any SLE	0.9056	0.01	0.8931	0.01	0.9553	0.01	0.9134	0.01	0.8969	0.03	0.8935	0.03
Endorsement of 4+ SLEs	0.4548	0.02	0.4222	0.02	0.6007	0.02	0.4961	0.02	0.2978	0.05	0.5294	0.04
By Female Sex
Variable Label	%	SE	%	SE	%	SE	%	SE	%	SE	%	SE
Endorsement 1 or more dichotomous Experiences of Discrimination items	0.1068	0.01	0.0718	0.01	0.1771	0.02	0.1372	0.01	0.1325	0.04	0.1286	0.02
Endorsement of Any Financial Adversity Item	0.2222	0.02	0.146	0.02	0.3734	0.03	0.3013	0.01	0.0999	0.03	0.3088	0.04
Caregiver Endorsement of Any ALE Item	0.5001	0.01	0.5089	0.02	0.5063	0.02	0.4958	0.02	0.229	0.05	0.557	0.04
Youth Endorsement of Any ALE Item	0.8222	0.01	0.8143	0.01	0.8572	0.01	0.8337	0.01	0.7299	0.06	0.8185	0.03
Endorsement of Any SLE	0.8957	0.01	0.8822	0.01	0.9437	0.01	0.9121	0.01	0.7962	0.05	0.8972	0.04
Endorsement of 4+ SLEs	0.4634	0.02	0.4069	0.02	0.5793	0.03	0.5153	0.02	0.2034	0.05	0.4968	0.03
Abbreviations. %=Percentage; SE=standard error; ALE=Adverse Life Event; SLE=Stressful Life Event

## Sheet: Stable 6
Supplemental Table 6. Models Examining a Race/Ethnic x Sex at Birth Interaction for Each SLE
Interaction Term	b	SE	t	p
Asian x Sex at Birth
Endorsement of Any Experiences of Discrimination	-0.1121	0.04323	-2.593	0.00952
Endorsement of Any Financial Adversity	-0.01636	0.04083	-0.401	0.6886
Youth Endorsement of Any ALE Item	0.0006673	0.04606	0.014	0.9884
Caregiver Endorsement of Any ALE Item	-0.05171	0.05355	-0.966	0.3342
Any SLE	-0.1007	0.06604	-1.524	0.127451
Black x Sex at Birth
Endorsement of Any Experiences of Discrimination	0.001808	0.0169	0.107	0.915
Endorsement of Any Financial Adversity	0.003069	0.0159	0.193	0.8469
Youth Endorsement of Any ALE Item	0.0261	0.018	1.45	0.147
Caregiver Endorsement of Any ALE Item	0.003318	0.02093	0.159	0.874
Any SLE	-0.06484	0.02606	-2.488	0.0129
Hispanic x Sex at Birth
Endorsement of Any Experiences of Discrimination	0.01303	0.01483	0.879	0.3795
Endorsement of Any Financial Adversity	0.01053	0.01395	0.755	0.4502
Youth Endorsement of Any ALE Item	0.01437	0.01589	0.904	0.366
Caregiver Endorsement of Any ALE Item	0.02957	0.01835	1.612	0.107
Any SLE	0.01346	0.02282	0.59	0.555
Multiracial/Multiethnic x Sex at Birth
Endorsement of Any Experiences of Discrimination	0.01997	0.01976	1.01	0.312
Endorsement of Any Financial Adversity	0.01265	0.01858	0.681	0.4961
Youth Endorsement of Any ALE Item	-0.006225	0.02078	-0.299	0.76457
Caregiver Endorsement of Any ALE Item	0.01785	0.02441	0.731	0.4647
Any SLE	0.04429	0.03028	1.463	0.144
White x Sex at Birth
Endorsement of Any Experiences of Discrimination	-0.009842	0.01194	-0.825	0.409627
Endorsement of Any Financial Adversity	-0.01446	0.01115	-1.296	0.1949
Youth Endorsement of Any ALE Item	-0.02244	0.01254	-1.79	0.0735
Caregiver Endorsement of Any ALE Item	-0.02479	0.01477	-1.679	0.0932
Any SLE	0.01067	0.01837	0.581	0.5615
Abbreviations. ALE=Adverse Life Event; SLE=Stressful Life Event; b=beta estimate; SE=standard error; t=t-test statistic

## Sheet: Stable 7
Supplemental Table 7. Models Examining a Race/Ethnic x Sex at Birth Interaction for Each SLE Sum
Interaction Term	b	SE	t	p
Asian x Female
Endorsement of Any Experiences of Discrimination	-0.1496	0.1312	-1.141	0.25406
Endorsement of Any Financial Adversity	-0.09096	0.1404	-0.648	0.51707
Youth Endorsement of Any Adverse Life Events	-0.05562	0.1115	-0.499	0.618
Caregiver Endorsement of Any Adverse Life Events	-0.08235	0.138	-0.597	0.55079
Any SLE	-0.08235	0.138	-0.597	0.55079
Black x Female
Endorsement of Any Experiences of Discrimination	0.01037	0.0514	0.202	0.84
Endorsement of Any Financial Adversity	-0.0123	0.05493	-0.224	0.8229
Youth Endorsement of Any Adverse Life Events	0.03925	0.04347	0.903	0.367
Caregiver Endorsement of Any Adverse Life Events	0.03367	0.05414	0.622	0.534
Any SLE	0.03367	0.05414	0.622	0.534
Hispanic x Female
Endorsement of Any Experiences of Discrimination	0.02335	0.04516	0.517	0.605085
Endorsement of Any Financial Adversity	0.05981	0.04809	1.244	0.2136
Youth Endorsement of Any Adverse Life Events	0.01475	0.03842	0.384	0.701
Caregiver Endorsement of Any Adverse Life Events	0.01352	0.04754	0.284	0.776
Any SLE	0.01352	0.04754	0.284	0.776
Multiracial/Multiethnic x Female
Endorsement of Any Experiences of Discrimination	0.04069	0.06	0.678	0.4978
Endorsement of Any Financial Adversity	0.01191	0.06411	0.186	0.853
Youth Endorsement of Any Adverse Life Events	-0.008811	0.04992	-0.177	0.8599
Caregiver Endorsement of Any Adverse Life Events	-0.02581	0.06335	-0.407	0.684
Any SLE	-0.02581	0.06335	-0.407	0.684
White x Female
Endorsement of Any Experiences of Discrimination	-0.03386	0.03622	-0.935	0.34986
Endorsement of Any Financial Adversity	-0.03763	0.0385	-0.977	0.3284
Youth Endorsement of Any Adverse Life Events	-0.02671	0.03027	-0.882	0.378
Caregiver Endorsement of Any Adverse Life Events	-0.0151	0.03826	-0.395	0.6932
Any SLE	-0.0151	0.03826	-0.395	0.6932
Abbreviations. ALE=Adverse Life Event; SLE=Stressful Life Event; b=beta estimate; SE=standard error; t=t-test statistic
